# Supplementary material
Source: publisher site journal article supplement (https://www.dovepress.com/article/396331)
Supplement: Supplementary file 1 [file get_supplementary_file.php]

Supplementary Tables

**Supplementary Table 1** CRE Clinical trial Case Report Form

| Name | |  | Sex | | | male□  female□ | | | Age | |  | | | Transferred from | | |  | |
| --- | --- | --- | --- | --- | --- | --- | --- | --- | --- | --- | --- | --- | --- | --- | --- | --- | --- | --- |
| The reason transferred to EICU | |  | | | | | Invasive devices or skin-barrier damage on admission | | | | | |  | | | | |
| Diagnose | |  | | | | | Complications | | | | | |  | | | | |
| Specimen type | |  | | | Temperature | |  | | | Admission time | | | | |  | | |
| Imaging information：Yes □ No□ | | | | | | | | | | | | | | | | | | |
| □Consolidation □Diffuse infiltration □Others | | | | | | | | | | | | | | | | | | |
| Medication | | | | | | | | | | | | | | | | | | |
| Antibiotic use before admission： □Yes □No | | | | | | | | Antifugal Drugs use before admission： □Yes □No | | | | | | | | | | |
| Antibiotic type | | | | | | | | Antifugal Drugs type | | | | | | | | | | |
| □Fluoroquinolones □β-lactamides containing enzyme inhibitors  □Aminoglycosides □Macrolides □Penicillins  □Glycopeptides □Oxazolidinone □Tetracyclines  □Generation cephalosporin □Second generation cephalosporin  □Third generation cephalosporin □Fourth generation cephalosporin  □Others | | | | | | | | Triazoles：□Fluconazole □Voriconazole □Itraconazole □Others  Polyene：□Amphotericin B □Amphotericin B liposomes □Others  Echinocandins：□Caspofungin □Micafungin □Anidulafungin □5-fluorouracil □Nicotinomycin □Others | | | | | | | | | | |
| Laboratory Testing | | | | | | | | | | | | | | | | | | |
| Test items | Unit | | | Results | | | | Test items | | | | Unit | | | | Results | |
| WBC | （109/L） | | |  | | | | HGB | | | | （g/L） | | | |  | |
| GRA | （109/L） | | |  | | | | ALT | | | | （U/L） | | | |  | |
| RBC | （1012/L） | | |  | | | | CR | | | | （μmoI/L） | | | |  | |
| PLT | （109/L） | | |  | | | | CRP | | | | （g/L） | | | |  | |
| MON | （109/L） | | |  | | | | PCT | | | | （ug/L） | | | |  | |
| LYM | （109/L） | | |  | | | | ESR | | | | （mm/h） | | | |  | |

An rectal swab was collected from each patient transmitted to the EICU for active screening, accompanied by a case report form (CRF) containing the clinical characteristics of the patients, including name, sex, age, admission time, temperature, diagnosis, invasive devices and/or skin barrier damage, and laboratory test results.

**Supplementary Table 2** Antibiotic resistance characteristics of CRE strains

|  | Patient ID | Gen | Imipenem | meropenem | Cefepime | Ceftriaxone | Cefazolin | Aztreonam | Amikacin | Ciprofloxacin | Gentamicin | Tobramycin | Tigecycline | Piperacillin  plus  tazobactam |
| --- | --- | --- | --- | --- | --- | --- | --- | --- | --- | --- | --- | --- | --- | --- |
| 2018049c* | 364827 | KPC | >=16 | 6 | 16 | >=64 | >=64 | >=64 | <=2 | >=4 | >=16 | >=16 | 20 | >=128 |
| 2018083c | 404003 | NDM | >=16 | 12 | >=64 | >=64 | >=64 | 8 | <=2 | >=4 | >=16 | 8 | 10 | >=128 |
| 2018101c | 318849 | KPC | >=16 | 6 | >=64 | >=64 | >=64 | >=64 | <=2 | >=4 | <=1 | <=1 | 20 | >=128 |
| 2018131c | 353890 | KPC | >=16 | 6 | 16 | >=64 | >=64 | >=64 | 4 | >=4 | >=16 | >=16 | 19 | >=128 |
| 2018144c | 387313 | KPC | >=16 | 6 | >=64 | >=64 | >=64 | >=64 | <=2 | >=4 | <=1 | <=1 | 18 | >=128 |
| 2018153c | 420063 | KPC | >=16 | 6 | >=64 | >=64 | >=64 | >=64 | <=2 | >=4 | <=1 | <=1 | 19 | >=128 |
| 2018160c | 423231 | KPC | >=16 | 6 | >=64 | >=64 | >=64 | >=64 | <=2 | >=4 | <=1 | <=1 | 19 | >=128 |
| 2018181c | 427824 | KPC | >=16 | 6 | >=64 | >=64 | >=64 | >=64 | >=64 | >=4 | >=16 | >=16 | 18 | >=128 |
| 2018186c | 429027 | KPC | >=16 | 6 | >=64 | >=64 | >=64 | >=64 | >=64 | >=4 | >=16 | >=16 | 18 | >=128 |
| 2018194c | 430837 | KPC | >=16 | 6 | >=64 | >=64 | >=64 | >=64 | <=2 | >=4 | <=1 | <=1 | 18 | >=128 |
| 2018199c | 322466 | KPC | >=16 | 6 | >=64 | >=64 | >=64 | >=64 | >=64 | >=4 | >=16 | >=16 | 18 | >=128 |
| 2018201c | 427939 | KPC | >=16 | 6 | >=64 | >=64 | >=64 | >=64 | >=64 | >=4 | >=16 | >=16 | 22 | >=128 |
| 2018208c | 424374 | KPC | >=16 | 6 | >=64 | >=64 | >=64 | >=64 | >=64 | >=4 | >=16 | >=16 | 21 | >=128 |
| 2018211c | 392880 | KPC | >=16 | 8 | >=64 | >=64 | >=64 | >=64 | >=64 | >=4 | >=16 | >=16 | 19 | >=128 |
| 2018002 | 361673 | KPC | >=16 | 6 | >=64 | >=64 | >=64 | >=64 | >=64 | >=4 | >=16 | >=16 | 17 | >=128 |
| 2018013 | 380030 | KPC | >=16 | 6 | >=64 | >=64 | >=64 | >=16 | >=64 | >=4 | >=16 | >=16 | 18 | >=128 |
| 2018036 | 394953 | KPC | >=16 | 6 | >=64 | >=64 | >=64 | >=64 | >=64 | >=4 | >=16 | >=16 | 12 | >=128 |
| 2018049 | 364827 | Kpc、NDM | >=16 | 6 | >=64 | >=64 | >=64 | >=64 | >=64 | >=4 | >=16 | >=16 | 19 | >=128 |
| 2018101 | 318849 | KPC | >=16 | 6 | >=64 | >=64 | >=64 | >=64 | <=2 | >=4 | <=1 | <=1 | 21 | >=128 |
| 2018109 | 405140 | NDM | >=16 | 12 | >=64 | >=64 | >=64 | >=64 | 4 | >=4 | 8 | >=16 | 12 | >=128 |
| 2018131 | 353890 | KPC | 8 | 6 | 32 | >=64 | >=64 | >=64 | 8 | >=4 | >=16 | >=16 | 19 | >=128 |
| 2018141 | 352267 | KPC | >=16 | 6 | >=64 | >=64 | >=64 | >=64 | >=64 | >=4 | >=16 | >=16 | 17 | >=128 |
| 2018147 | 416772 | Kpc、NDM | >=16 | 6 | >=64 | >=64 | >=64 | >=64 | >=64 | >=4 | >=16 | >=16 | 17 | >=128 |
| 2018148 | 250464 | Kpc、NDM | >=16 | 6 | >=64 | >=64 | >=64 | 4 | >=64 | >=4 | >=16 | >=16 | 23 | 64 |
| 2018152 | 318849 | KPC | >=16 | 6 | >=64 | >=64 | >=64 | >=64 | <=2 | >=4 | <=1 | <=1 | 19 | >=128 |
| 2018157 | 418786 | KPC | >=16 | 6 | >=64 | >=64 | >=64 | >=16 | <=2 | >=4 | >=16 | <=1 | 14 | >=128 |
| 2018190 | 378142 | Kpc、NDM | >=16 | 6 | >=64 | >=64 | >=64 | >=64 | <=2 | >=4 | <=1 | <=1 | 18 | >=128 |
| 2018201 | 427939 | KPC | >=16 | 6 | >=64 | >=64 | >=64 | >=64 | >=64 | >=4 | >=16 | >=16 | 18 | >=128 |
| 2018204 | 381155 | NDM | >=16 | 6 | >=64 | >=64 | >=64 | >=64 | 16 | >=4 | >=16 | >=16 | 22 | >=128 |
| 2018208 | 424374 | KPC | >=16 | 6 | >=64 | >=64 | >=64 | >=64 | >=64 | >=4 | >=16 | >=16 | 18 | >=128 |

*c. Stains collected from clinical culture during the hospitalization.
